# Supplementary material
Source: PubMed Central journal article supplement (PMC7022166)
Supplement: pnas.1914282117.sapp.pdf [file pnas.1914282117.sapp.pdf]

## **Supporting Information**

### **An RNA Polymerase Ribozyme that Synthesizes its Own Ancestor**

Katrina F. Tjhung, Maxim N. Shokhirev, David P. Horning, and Gerald F. Joyce

The Salk Institute

10010 North Torrey Pines Road

La Jolla, CA 92037, USA

E-mail: [dhorning@salk.edu](mailto:dhorning@salk.edu), [gjoyce@salk.edu](mailto:gjoyce@salk.edu)

## SI Methods

**In Vitro Transcription.** Fragments of the class I ligase were produced by in vitro transcription of double-stranded DNA using T7 RNA polymerase (see Table S4 for sequences). Fragments longer than 30 nucleotides were prepared as described previously (1). For fragments shorter than 30 nucleotides, in vitro transcription was performed under conditions that maximized the yield of correct-length products (2). RNA was transcribed from 50 nM DNA template that had been annealed with 60 nM synthetic oligodeoxynucleotide that contains the second strand of the T7 RNA polymerase promoter. In vitro transcription was carried out in a reaction mixture containing 15 U/ $\mu$ L T7 RNA polymerase, 0.002 U/ $\mu$ L inorganic pyrophosphatase, 5 mM each NTP, 9 mM MgCl<sub>2</sub>, 1 mM spermidine, 5 mM DTT, 50  $\mu$ g/mL bovine serum albumin, 0.01% Triton X-100, 80 mg/mL PEG-8000, and 40 mM Tris (pH 8.1), which was incubated at 37 °C for 2 h, followed by addition of 0.1 U/ $\mu$ L TurboDNase and incubation at 37 °C for 1 h. All reactions were quenched by the addition of excess EDTA relative to MgCl<sub>2</sub>, then the products were purified by PAGE and subsequent ethanol precipitation.

## SI References

1. D. P. Horning, G. F. Joyce, Amplification of RNA by an RNA polymerase ribozyme. *Proc. Natl. Acad. Sci. U.S.A.* **113**, 9786–9791 (2016).
2. J. F. Milligan, D. R. Groebe, G. W. Witherell, O. C. Uhlenbeck, Oligoribonucleotide synthesis using T7 RNA polymerase and synthetic DNA templates. *Nucleic Acids Res.* **15**, 8783–8798 (1987).

## SI Figure Legends

**Fig. S1.** Time course of RNA ligation catalyzed by various forms of the class I ligase, all prepared by in vitro transcription using T7 RNA polymerase. The ligase was provided as a contiguous strand (black circles), 3 separate fragments (white circles), or 3 separate fragments with added primer regions at both ends of each fragment (black squares). Multiple-turnover, first-order rate constants are 0.33, 0.050, and 0.0062 min<sup>-1</sup>, respectively. Reaction conditions: 1 μM ligase (either contiguous or each fragment), 20 μM 5'-substrate (S2), 80 μM 3'-substrate with attached template (S3), 60 mM MgCl<sub>2</sub>, 200 mM KCl, and 0.6 mM EDTA at pH 8.3 and 23 °C.

**Fig. S2.** Time course of RNA ligation catalyzed by the 3-fragment form of the class I ligase that had been synthesized by the 38-6 polymerase over 72 h (black circles). The uncatalyzed, RNA-templated reaction was measured under the same conditions (white circles). First-order rate constants are  $6.1 \pm 0.2 \times 10^{-5}$  and  $0.86 \pm 0.08 \times 10^{-5}$  h<sup>-1</sup>, respectively. Values are the average of 3 replicates, with standard deviation. Reaction conditions: ±1 μM ligase fragments, 20 μM 5'-substrate (S2), 80 μM 3'-substrate (S3), 60 mM MgCl<sub>2</sub>, 200 mM KCl, and 0.6 mM EDTA at pH 8.3 and 23 °C.

**Table S1. Fidelity of the 24-3 and 38-6 polymerases**

| Pol  | Expected | Observed (%) |              |             |             |     |     |
|------|----------|--------------|--------------|-------------|-------------|-----|-----|
|      |          | A            | G            | C           | U           | Del | Ins |
| 24-3 | A        | <b>91.7</b>  | 6.9          | 0.0         | 0.0         | 1.4 | 0.0 |
|      | G        | 0.0          | <b>100.0</b> | 0.0         | 0.0         | 0.0 | 0.0 |
|      | C        | 0.0          | 0.0          | <b>98.6</b> | 1.4         | 0.0 | 0.0 |
|      | U        | 0.9          | 0.9          | 0.0         | <b>98.1</b> | 0.0 | 0.0 |
| 38-6 | A        | <b>98.6</b>  | 0.0          | 0.0         | 0.0         | 1.4 | 0.0 |
|      | G        | 0.0          | <b>97.3</b>  | 0.5         | 0.0         | 0.0 | 2.2 |
|      | C        | 0.0          | 0.0          | <b>94.4</b> | 5.6         | 0.0 | 0.0 |
|      | U        | 0.9          | 2.8          | 0.9         | <b>94.4</b> | 0.9 | 0.0 |

Operating on the favorable template 3'-ACGCUUCGCAC-5', the average fidelities of 24-3 and 38-6 were 97.1% and 96.2%, respectively, based on 36 reads each and calculated as the geometric mean of the fidelities for each templating nucleobase, including deletions. Insertions were treated as a single mutation event at the position immediately upstream of the insertion.

**Table S2. Sequences of cloned individuals obtained from synthesis of fragment 1 of the class I ligase by the 38-6 polymerase**

| 5'      | 10     | 20      | 30        | 40          | 3'               |
|---------|--------|---------|-----------|-------------|------------------|
| GGAAAAG | ACAAA  | TCTGC   | CCTCAGAGC | TTGAGA      | A C A T C TT C   |
| ...     | G....  | .T...   | ..A.G.... | A.....      | C . . . . .C .   |
| .....   | C.G..  | ..-..   | .....     | .....       | - . . . . .C .   |
| .....   | .....  | ..T     | .....     | .....       | . . . C . GC .   |
| .....   | G....  | .....   | .....T    | A....G      | . ^- - - .       |
| ..G.... | -      | .....   | .....^    | -----       | - . . C . .C .   |
| ..G.... | G.G..  | .....   | .G.....   | G.....      | C . . . . .^ . G |
| .....   | G....  | .....   | T.G.....  | .....       | C . . ^- - - -   |
| .....   | .....  | .....   | .C.G....  | .....       | C . . . . .G .   |
| ..TG..  | .....  | .....   | -         | A..G..      | G . . . . .- -   |
| ..G-..  | ..G    | .....   | .G.....   | .....       | C . G C . -- A   |
| ..G-..  | ..G    | .....   | .G.....   | .....       | C . G C . A- -   |
| .....   | .....  | C....   | -         | GC....      | . - G . C .      |
| .....   | G....  | .....   | .....     | ..T..       | . . G G GG .     |
| ..G.... | G....  | .....   | ..G....   | .....       | . . . ^- - - .   |
| ..G.... | ^      | .....   | .C.....   | -G..        | C . . . . .A-    |
| .....   | C....  | .....   | A....     | GC....      | . . . . .-       |
| .....   | G....  | .....T  | .G....    | .....       | . . . ^- - - .   |
| .....   | ..G    | GGCTA   | A.C.G.... | .....       | C . . C . AG^ .  |
| .....   | G....  | ----    | .....     | .....       | . . . . .^ - - - |
| ..G.... | ..--   | ----    | .....     | .....       | . ^ . ^ . A . C- |
| .....   | C....  | .....^  | .....     | ..C..       | C . . - . GC A   |
| ..G.... | .....^ | -----   | -----     | -----       | - - - - -        |
| ..G.... | .....  | ..G.... | .....     | .....^      | - - - - -        |
| ..G.... | -      | .....-  | .....G..  | C . . . . . | . ^ . . A .      |
| ..G.... | ..-    | -GG..   | .GG....   | A....       | . . . . .- -     |
| .....   | .....  | .....   | A....     | G-..        | C . . . . .^ - - |
| ..G.... | -      | .....-  | .....G..  | C . . . . . | . ^ . . A .      |
| .....   | .....  | .....   | ..-G....  | .....       | C . . . . .-     |
| ..G.... | .....  | .....T  | .....     | .....^      | - - - - -        |
| .....   | .....  | .....T  | .....     | .....       | . . ^- - - -     |

Sequences of 30 individuals, aligned in reference to the correct sequence of fragment 1. The flanking primer regions are not shown. Dots indicate nucleotides that match the correct sequence, dashes indicate sites of deletion, and carat marks indicate sites of insertion of one or more nucleotides.

**Table S3. Fidelity of the 24-3 and 38-6 polymerases**

| Pol  | Expected | Observed (%) |             |             |             |     |     |
|------|----------|--------------|-------------|-------------|-------------|-----|-----|
|      |          | A            | G           | C           | U           | Del | Ins |
| 24-3 | A        | <b>88.0</b>  | <u>6.7</u>  | 2.7         | 0.8         | 1.8 | 0.2 |
|      | G        | 0.5          | <b>97.5</b> | 0.7         | 0.7         | 0.6 | 0.1 |
|      | C        | 0.4          | 0.5         | <b>93.2</b> | <u>5.6</u>  | 0.4 | 0.1 |
|      | U        | 1.5          | 1.9         | 5.4         | <b>90.1</b> | 1.1 | 0.1 |
| 38-6 | A        | <b>88.5</b>  | <u>7.0</u>  | 1.2         | 0.4         | 3.0 | 0.2 |
|      | G        | 0.3          | <b>98.5</b> | 0.4         | 0.2         | 0.6 | 0.1 |
|      | C        | 0.3          | 0.7         | <b>89.7</b> | <u>8.8</u>  | 0.6 | 0.1 |
|      | U        | 0.7          | 1.1         | 2.6         | <b>94.7</b> | 1.0 | 0.1 |

Operating on the template 3'-CUGCAUGACUACUCCGGCUUCCGG-CUUUUCGC-5', which encodes the hammerhead ribozyme, the average fidelities of 24-3 and 38-6 were 92.1 and 92.8%, respectively, based on deep sequencing analysis and calculated as the geometric mean of the fidelities for each templating nucleobase, including deletions. Insertions were treated as a single mutation event at the position immediately upstream of the insertion. Wobble mutations are underlined.

**Table S4. Sequences of RNA and DNA molecules used in this study**

| Type             | Name             | R or DNA | Source                                  | Sequence (5'→3')                                                                                                                                                                       |
|------------------|------------------|----------|-----------------------------------------|----------------------------------------------------------------------------------------------------------------------------------------------------------------------------------------|
| PCR primer       | Fwd1             | DNA      | com                                     | GGACTAATACGACTCACTATTAGTCATTGCCGCAC                                                                                                                                                    |
|                  | Rev1             | DNA      | com                                     | GTCAGCCATGTGTTG                                                                                                                                                                        |
| Ribozyme         | 24-3 pol         | RNA      | ivt                                     | AGUCAUUGCCGCACGAAAAGACAAAUCUGCCCCUCAGAGCUUGAGAACAUCUUCGGAUGCAGAGGAGGGGCCUUCGGUGGAACGAUCGUGCCACCGUUCUCAACACGUACCGAACGAAAAAGACCUGACAAAAAGGCGUUGUUAGACACGCCCAGGUGCCAUACCCAACACAUGGCUGAC   |
|                  | 38-6 pol         | RNA      | ivt                                     | AGUCAUUGCCGCACAAAAGACAAAUCUCCCCUCAGAGCUUGAGAACAUCUACGGAUGCAGAGGAGGGGCCUUCGGUGGAUCAAUUGUGCACCACCGUUCUCAACACGUACCGAACAUAAAAAGACCUGACAAAAAGGCGAUGUUA GACACGCACAGGUGCCAUACCCAACACAUGGCUGAC |
|                  | hammer-head      | RNA      | ivt                                     | CACUCCACACGACGUACUGAUGAGGCCGAAAGGCCGAAAGCG                                                                                                                                             |
|                  | class I ligase   | RNA      | ivt                                     | GGAAAAGACAAAUCUGCCCCUCAGAGCUUGAGAACAUCUUCGGAUGCAGGGGAGGCAGCCCCGGUGGCUUUAACGCCAACGUUCUCAACAAUAGUGA                                                                                      |
|                  | F1               | RNA      | ivt                                     | GGAUGCUACAUGGGAAAAGACAAAUCUGCCCCUCAGAGCUUGAGAACAUCUUCGACAUUCGUGUC                                                                                                                      |
|                  | F2               | RNA      | ivt                                     | GGUCGAAUGAUCGGAUGCAGGGGAGGCAGCCCCCGGUGGCGCAAUAGUUGGU                                                                                                                                   |
|                  | F3               | RNA      | ivt                                     | GGCAUAUCCAGCGCGCCAACGUUCUCAACAAUAGUGACGUACGAAUCGU                                                                                                                                      |
|                  | F1 (w/o primers) | RNA      | ivt                                     | GGAAAAGACAAAUCUGCCCCUCAGAGCUUGAGAACAUCUUC                                                                                                                                              |
|                  | F2 (w/o primers) | RNA      | ivt                                     | GGAUGCAGGGGAGGCAGCCCCGGUGGCGC                                                                                                                                                          |
|                  | F3 (w/o primers) | RNA      | ivt                                     | GCGCCAACGUUCUCAACAAUAGUGA                                                                                                                                                              |
| Extension primer | P1a              | RNA      | syn                                     | hexynyl-(PEG) <sub>4</sub> -CGCUUAUACGUC-PEG-biotin-PEG-pc1-PEG-FAM-CACUCCACAC (hammerhead selection)                                                                                  |
|                  | P1b              | RNA      | syn                                     | FAM-biotin-CACUCCACAC (hammerhead synthesis)                                                                                                                                           |
|                  | P2               | RNA      | syn                                     | FAM-biotin-GCGGAUUUAGCUCAG (tRNA synthesis)                                                                                                                                            |
|                  | P3               | RNA      | syn                                     | FAM-biotin-GGAAAAGACAAAUCUGCCCU (class I ligase synthesis)                                                                                                                             |
|                  | P4               | RNA      | syn                                     | FAM-biotin-GGAUGCUACAUG (F1 synthesis)                                                                                                                                                 |
|                  | P5               | RNA      | syn                                     | FAM-biotin-GGUCGAAUGAUC (F2 synthesis)                                                                                                                                                 |
|                  | P6               | RNA      | syn                                     | FAM-biotin-GGCAUAUCCAGC (F3 synthesis)                                                                                                                                                 |
|                  | P7               | RNA      | syn                                     | FAM-biotin-GACACGAAUGUC (F1' synthesis)                                                                                                                                                |
|                  | P8               | RNA      | syn                                     | FAM-biotin-ACCAACUAUUGC (F2' synthesis)                                                                                                                                                |
| P9               | RNA              | syn      | FAM-biotin-ACGAUUCGUACG (F3' synthesis) |                                                                                                                                                                                        |

|            |      |       |     |                                                                                                                                                                               |
|------------|------|-------|-----|-------------------------------------------------------------------------------------------------------------------------------------------------------------------------------|
| Template   | Tem1 | RNA   | ivt | <u>GACAAUGACAAAAAA</u> CGCUUUUCGGCCUUUCGGCCUC<br>AUCAGUACGUC <u>GUGUGGAGUG</u> (hammerhead synthesis)                                                                         |
|            | Tem2 | RNA   | ivt | <u>GACAAUGACAAAAAA</u> UGGUGCGAAUUCUGGGAUCG<br>AACACAGGACCUCCAGAUUCAGUCUGGGCGCUCUCC<br>CAAC <u>GAGCUAAAUCGCG</u> (tRNA synthesis)                                             |
|            | Tem3 | RNA   | ivt | <u>GACAAUGACAAAAAA</u> UCACUAUUGUUGAGAACGUUG<br>GCGUAAAAGCCACCGGGGGCUGCCUCCCCUGCAUCCG<br>AAGAUUUCUCAAGCUCUG <u>AGGGCAGAUUUGUCUUU</u><br><u>UCC</u> (class I ligase synthesis) |
|            | Tem4 | RNA   | ivt | <u>GACAAUGACAAAAAA</u> GACACGAAUGUCGAAGAUGUU<br>CUCAAGCUCUGAGGGCAGAUUUGTCUUU <u>UCCCAUGUA</u><br><u>GCAUCC</u> (F1 synthesis)                                                 |
|            | Tem5 | RNA   | ivt | <u>GACAAUGACAAAAAA</u> ACCAACUAUUGCGGCCACCGG<br>GGGCGCCUCCCCUGCAUCC <u>GAUCAUUCGACC</u> (F2<br>synthesis)                                                                     |
|            | Tem6 | RNA   | ivt | <u>GACAAUGACAAAAAA</u> ACGAUUCGUACGUCACUAUUG<br>UUGAGAACGUUGGGCG <u>CGUGGAUUGCC</u> (F3 synthesis)                                                                            |
|            | Tem7 | RNA   | ivt | <u>GACAAUGACAAAAAA</u> GGAUGCUACAUGGGAAAAGAC<br>AAAUCUGCCCUCAGAGCUUGAGAACAUCUUC <u>GACAUU</u><br><u>CGUGUC</u> (F1' synthesis)                                                |
|            | Tem8 | RNA   | ivt | <u>GACAAUGACAAAAAA</u> GGUCGAAUGAUCGGAUGCAGG<br>GGAGGCAGCCCCGGUGGGCG <u>GCAAUAGUUGGU</u> (F2'<br>synthesis)                                                                   |
|            | Tem9 | RNA   | ivt | <u>GACAAUGACAAAAAA</u> GGCAUAUCCAGCGGCCAACGU<br>UCUCAACAAUAGUGAC <u>CGUACGAAUCGU</u> (F3' synthesis)                                                                          |
| Substrate  | S1   | RNA   | syn | Cy5-CGCUUAUACGUC-FAM (hammerhead reaction)                                                                                                                                    |
|            | S2   | R/DNA | syn | Cy5-d(AAA)-r(CCAGUC) (ligase reaction)                                                                                                                                        |
|            | S3   | RNA   | syn | pppGGAACAUUAUACGACUGGCACCAU (ligase reaction)                                                                                                                                 |
| Sequencing | Fwd2 | DNA   | com | GGAGCAAAACGAGG                                                                                                                                                                |
|            | Fwd3 | DNA   | com | GGGGGGATGCTACATG                                                                                                                                                              |
|            | Fwd4 | DNA   | com | TCGTGGCAGCGTCAGATGTGTATAAGAGACAGCTACA<br>GGGCACTCCACAC                                                                                                                        |
|            | Rev2 | DNA   | com | ATTGATGGTGCCTACAG                                                                                                                                                             |
|            | Rev3 | DNA   | com | GCCTACAGTTTGACACGAATGTC                                                                                                                                                       |
|            | Rev4 | DNA   | com | GTCTCGTGGGCTCGGAGATGTGTATAAGAGACAGATTG<br>ATGGTGCCTACAG                                                                                                                       |

The molecules were synthesized in-house (syn), purchased from IDT (com), or prepared by in vitro transcription (ivt). The T7 RNA polymerase promoter sequence is underlined. Sequences in red indicate the 5' tag used on polymerase ribozymes and templates to improve processivity. Sequences in blue are primer binding sites on templates used for polymerase extension assays. PEG, polyethylene glycol spacer; pcl, photocleavable linker; FAM, 6-fluorescein label; Cy5, cyanine 5-methine label, ppp, 5'-triphosphate added by chemical synthesis.



Figure S1

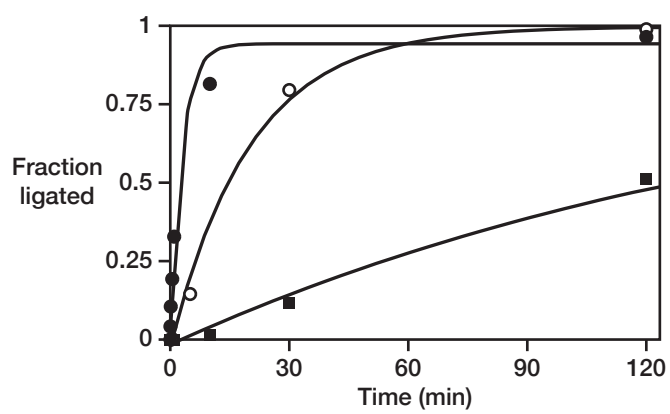

Figure S2

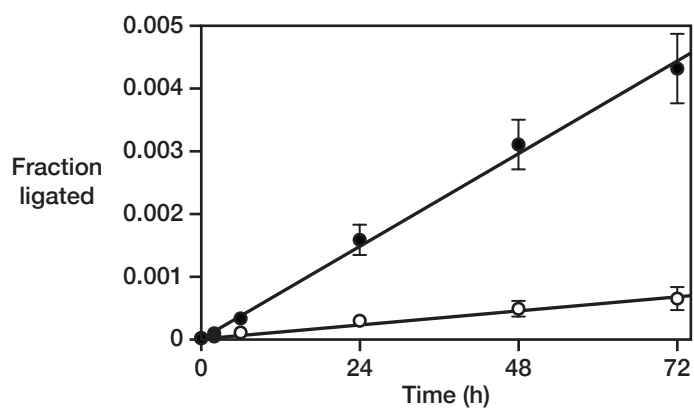

## Java script ParseZymeReads

```
public class ParseZymeReads {

    private char[] template;
    private int[] map;
    private int[][] counts;
    private int end;
    private int length = -1;

    public ParseZymeReads(String[] args) {
        SuperScanner ss = new SuperScanner(args[0]);
        template = ss.getLine().split(" > ")[0].toCharArray();
        ss.getLine(); //skip the alignment line
        end=Integer.parseInt(args[1]);

        if(args.length > 2)
            length=Integer.parseInt(args[2])-1;
        //0=match 1=mismatch A, 2=mismatch C, 3=mismatch G, 4=mismatch T, 5=deletion 6=insertion
        //7=insertion1 8=insertion2 ...26=insertion20
        counts=new int[end][27];
        map = new int[template.length];
        int index = 0;
        map[0]=0;
        for(int i = 1; i < template.length; i++)
        {
            if(template[i]=='-')
                map[i]=index;
            else
            {
                index++;
                map[i]=index;
            }
        }
        int count =0;
        while(ss.hasMore())
        {
            String r = ss.getLine().split(" > ")[0];
            processRead(r);
            count++;
            if(count%100000==0){
                System.err.println(count);
            }
        }
        //now let's output the results
        String header = "Position";
        if(length>-1)
            header=length+"Position";
        System.out.println(header+"\tMatches\tMismatch A\tMismatch C\tMismatch G\tMismatch
T\tDeletions\tInsertions\tIns1\tIns2\tIns3\tIns4\tIns5\tIns6\tIns7\tIns8\tIns9\tIns10\tIns11\tIns12\tIns13\tIn
s14\tIns15\tIns16\tIns17\tIns18\tIns19\tIns20");
        for(int i = 0; i < counts.length; i++)
        {
```

```

        System.out.print(i+1);
        for (int j = 1; j < counts[i].length; j++)
        {
            System.out.print("\t"+counts[i][j-1]);
        }
        System.out.println();
    }
}

/**
 * Tabulates the position-specific stats of the read. If length is set, then read must have that length to
be counted.
 * @param read
 */
private void processRead(String read)
{
    read=formatLeadingWhiteSpace(read);
    char[] c = read.toCharArray();
    if(length > -1)
    {
        int readLength= end;
        if(read.indexOf(' ') < map.length && read.indexOf(' ')>-1)
            readLength=map[read.indexOf(' ')-1];
        if(readLength != length)
            return;
    }
    int insertSize=0;
    for(int i = 0 ; i < Math.min(c.length,template.length); i++)
    {
        char t = template[i];
        char r = c[i];
        if(r == ' '){
            break; // the read ended so let's stop counting.
        }
        if(c[i]!='-')
        {
            if(t == r){
                counts[map[i]][0]++; //match
                if(insertSize>0)
                {
                    counts[map[i-1]][6]++;
                    counts[map[i-1]][insertSize+6]++;
                    insertSize=0;
                }
            }
            else
            {
                if(t=='-') //insertion
                {
                    insertSize++;
                }
                else
                {
                    if(r=='A')

```

```

        counts[map[i]][1]++; //mismatch A
    else if(r=='C')
        counts[map[i]][2]++; //mismatch C
    else if(r=='G')
        counts[map[i]][3]++; //mismatch G
    else if(r=='T')
        counts[map[i]][4]++; //mismatch T
    if(insertSize>0)
    {
        counts[map[i-1]][6]++;
        counts[map[i-1]][insertSize+6]++;
        insertSize=0;
    }
    }
}
else //a dash in the read
{
    if(t != r) //deletion
    {
        counts[map[i]][5]++;
        if(insertSize>0) //an insert that ends with a deletion
        {
            counts[map[i-1]][6]++;
            counts[map[i-1]][insertSize+6]++;
            insertSize=0;
        }
    }
}
}
}

/**
 * Preprocess the reads to remove leading whitespace
 * @param read
 * @return
 */
private String formatLeadingWhiteSpace(String read) {
    // TODO Auto-generated method stub
    char[] chars = read.toCharArray();
    for(int i = 0; i < chars.length; i++)
    {
        if(chars[i]==' ')
            chars[i]='-';
        else break;
    }
    return new String(chars);
}

public static void main(String[] args) {
    // TODO Auto-generated method stub
    if(args.length > 1)
        new ParseZymeReads(args);
    else

```

```

    {
        System.err.println("Usage: ParseZymeReads breseqBamToAln TemplateLength [length of
reads to quantify]");
        System.err.println("Will create a tab-separated table of matches, mismatches, insertions,
deletions, and insertion lengths for each position of the template.\n"
+ "If a third argument is provided, it will only tabulate reads of the specified length.
Output is to standard output.");
    }
}
}

```

## Java script SuperScanner

```

import java.io.BufferedReader;
import java.io.FileInputStream;
import java.io.IOException;
import java.io.InputStream;
import java.io.InputStreamReader;
import java.util.zip.GZIPInputStream;

public class SuperScanner {

    BufferedReader s = null;

    public SuperScanner(String file)
    {
        try{
            InputStream fileStream = new FileInputStream(file);
            if(file.endsWith(".gz"))
                s = new BufferedReader(new InputStreamReader(new GZIPInputStream(fileStream)));
            else
                s = new BufferedReader(new InputStreamReader(fileStream));
        }catch(IOException e)
        {
            e.printStackTrace();
        }
    }

    public void close()
    {
        try {
            s.close();
        } catch (IOException e) {
            // TODO Auto-generated catch block
            e.printStackTrace();
        }
    }

    public boolean hasMore()
    {
        try {

```

```
        return s.ready();
    } catch (IOException e) {
        // TODO Auto-generated catch block
        e.printStackTrace();
    }
    return false;
}

public String getLine()
{
    try {
        return s.readLine();
    } catch (IOException e) {
        // TODO Auto-generated catch block
        return null;
    }
}
}
```
